# Supplementary material for: Membrane transporter dimerization driven by differential lipid solvation energetics of dissociated and associated states
Source: eLife. 2021 Apr 7;10:e63288. doi: 10.7554/eLife.63288 (PMC8116059; doi:10.7554/eLife.63288)
Supplement: Figure 4—source data 7. — Total mean Cy5 labeling yields for WT, WW and RCLC protein samples. [file elife-63288-fig4-data7.xlsx]

## Sheet: Overall PCy5
	Sample	WT PCy5	WW PCy5	RCLC PCy5
fusion	1	0.7	0.75	0.73
	2	0.68	0.75	0.71
	3	0.7	0.81	0.74
titration	1	0.67
	2	0.67
	3	0.67
	4	0.67
	5	0.65
	6	0.65
	7	0.66
	8	0.64
	9	0.65
	10	0.64
	11	0.68
	12	0.62
	13	0.6
	14	0.65
	15	0.66
function	1	0.67
	2	0.64
	3	0.65
	4	0.7
	5	0.69
20% DL	1	0.66
	2	0.67
	3	0.69
	4	0.68
	mean	0.663333	0.77	0.726667
	std. dev.	0.0240192	0.034641	0.0152753
	count	27	3	3
	sem	0.0046225	0.02	0.00881917
